# Supplementary material for: Inkjet Printing of Long-Range Ordering Two-Dimensional Magnetic Ti0.8Co0.2O2 Film
Source: MDPI journal article supplement (doi:10.3390/nano14100834), 2024-05-09
Supplement: s1 [file s1]

## Supporting Information

# Inkjet Printing of Long-Range Ordering Two-Dimensional Magnetic $\text{Ti}_{0.8}\text{Co}_{0.2}\text{O}_2$ Film

Yuntian Du and Pengxiang Zhang \*

State Key Laboratory of Silicate Materials for Architectures, School of Materials Science and Engineering, Wuhan University of Technology, Wuhan 430070, China; duyuntian@whut.edu.cn

\* Correspondence: zhangpengxiang@whut.edu.cn

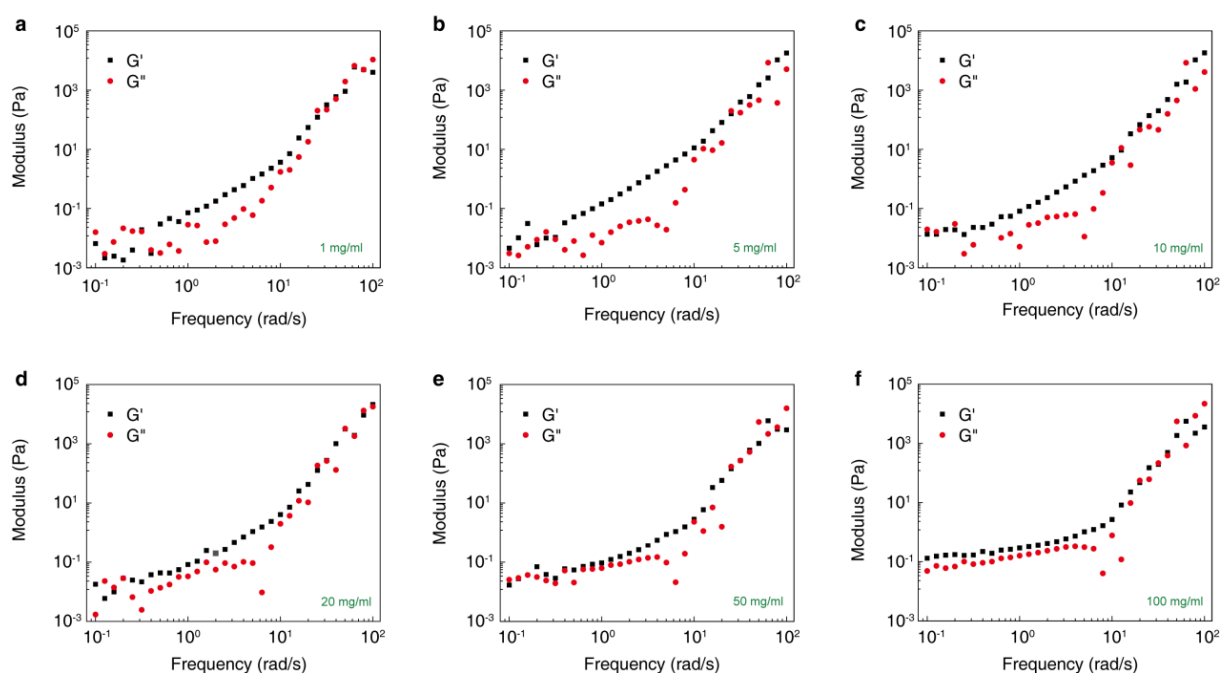

**Figure S1.** Elastic( $G'$ ) and viscous( $G''$ ) moduli of small-sized  $\text{Ti}_{0.8}\text{Co}_{0.2}\text{O}_2$  nanosheet ink with different concentrations as a function of frequency. (a) 1 mg/mL, (b) 5 mg/mL, (c) 10 mg/mL, (d) 20 mg/mL, (e) 50 mg/mL, and (f) 100 mg/mL.

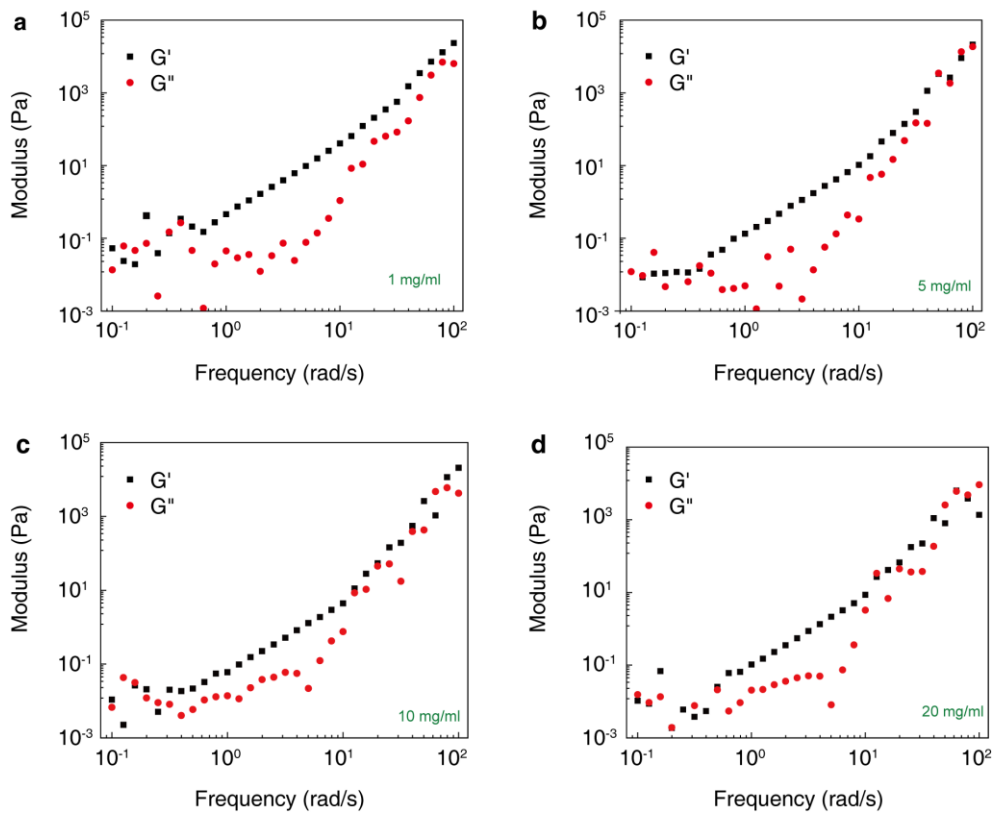

**Figure S2.** Elastic( $G'$ ) and viscous( $G''$ ) moduli of large-sized  $\text{Ti}_{0.8}\text{Co}_{0.2}\text{O}_2$  nanosheet ink with different concentrations as a function of frequency. (a) 1 mg/mL, (b) 5 mg/mL, (c) 10 mg/mL, and (d) 20 mg/mL.

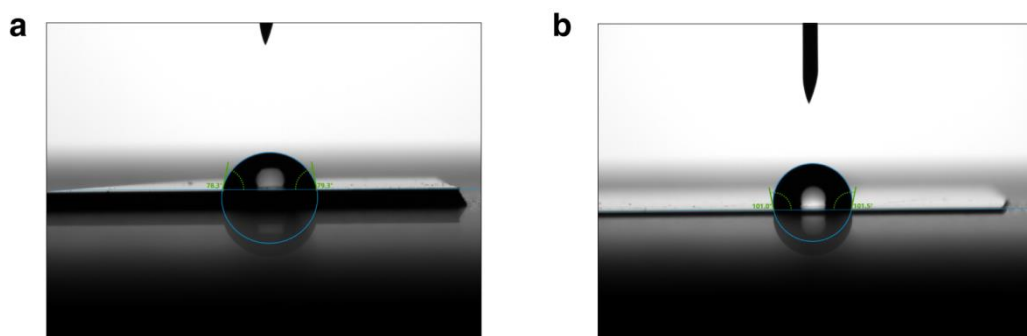

**Figure S3.** Contact angle of aqueous solution on (a)  $\text{SiO}_2$  and (b) PET substrate.
